# Supplementary material for: The Ciliopathy Gene ahi1 Is Required for Zebrafish Cone Photoreceptor Outer Segment Morphogenesis and Survival
Source: PubMed Central journal article supplement (PMC5270624; doi:10.1167/iovs.16-20326), 2017-01
Supplement: iovs-58-01-18_s01.pdf [file iovs-58-01-18_s01.pdf]

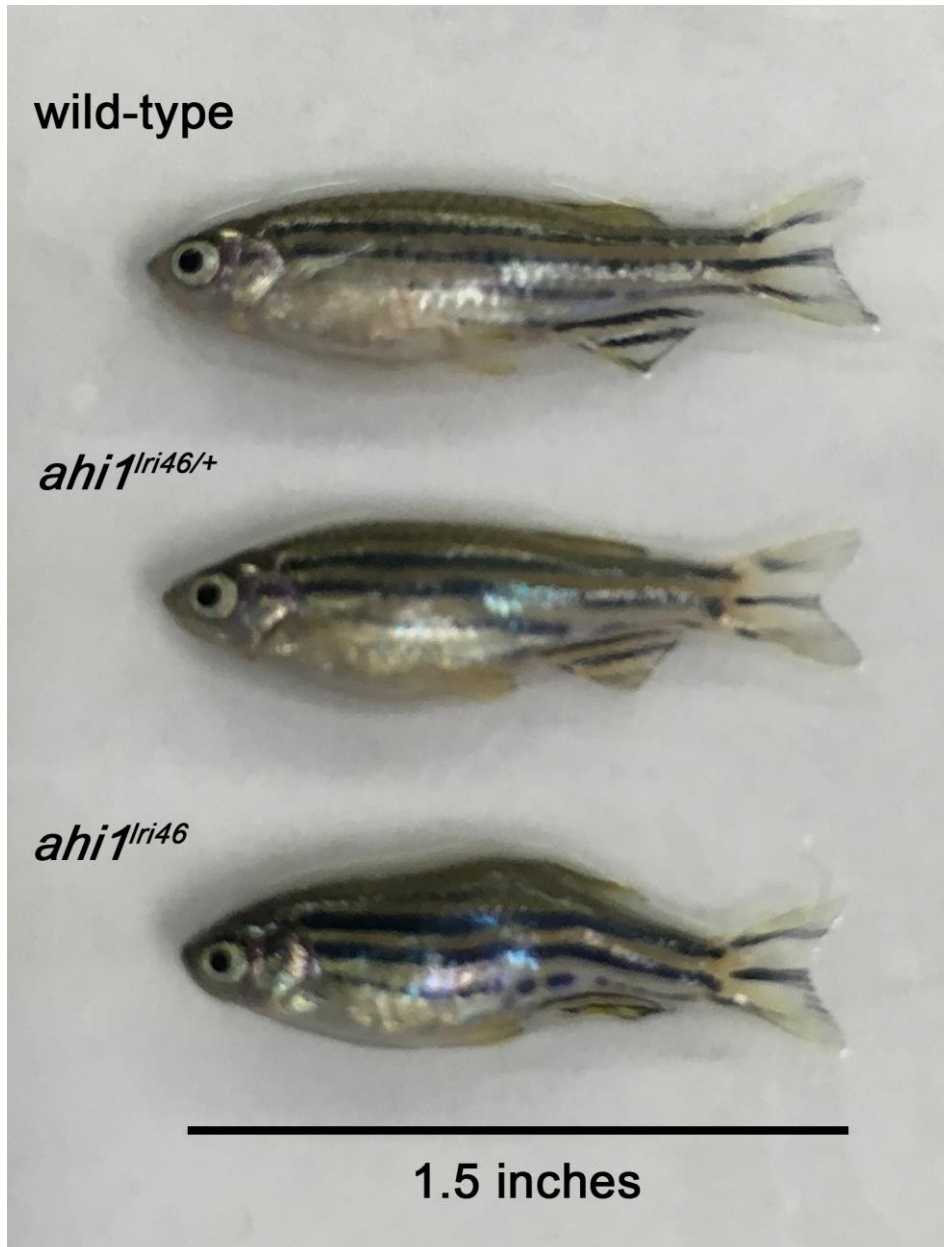

**Supplemental Figure 1. Zebrafish *ahi1* mutants have a characteristic phenotype.**

Lateral view of 5-month-old wild-type, heterozygous (*ahi1<sup>lri46/+</sup>*) and homozygous *ahi1<sup>lri46</sup>* mutant displaying scoliosis of the vertebral column.
